# Supplementary material
Source: PubMed Central journal article supplement (PMC5803417)

**Supplemental Fig. 1. mTORC1 hyperactivation throughout the brain of *Depdc5cc+* mice.** Composite images from coronal brain sections from control (left panels) and *Depdc5cc+* (right panels) mouse brains stained with NeuN and p-S6. Sections were matched for anatomic localization between mice and images taken at the same scale, scale bars = 1000 $\mu$ m. Sections from *Depdc5cc+* (n=4) and littermate control (n=3) brains.

**Supplemental Fig. 2. mTORC1 hyperactivation is not present in oligodendrocytes of *Depdc5cc+* mice.** (A) No evidence of colocalization of Olig2 (green) and p-S6 (red) in the cortex, hippocampus, or white matter, scale bars = 100 $\mu$ m. (B) High power image at the corpus callosum, scale bar = 50 $\mu$ m. Sections from *Depdc5cc+* (n=4) and littermate control (n=3) brains.

Control

*Depdc5* cc+

NeuN

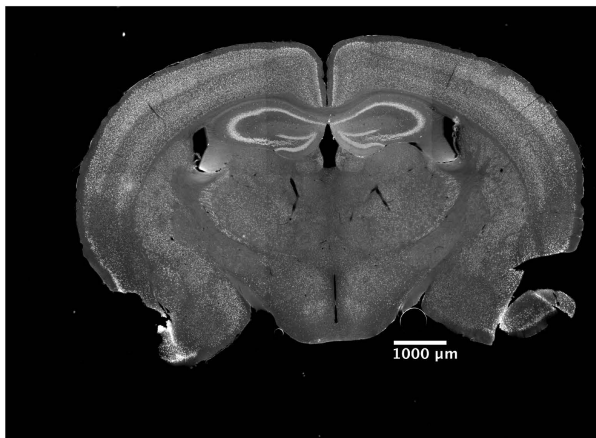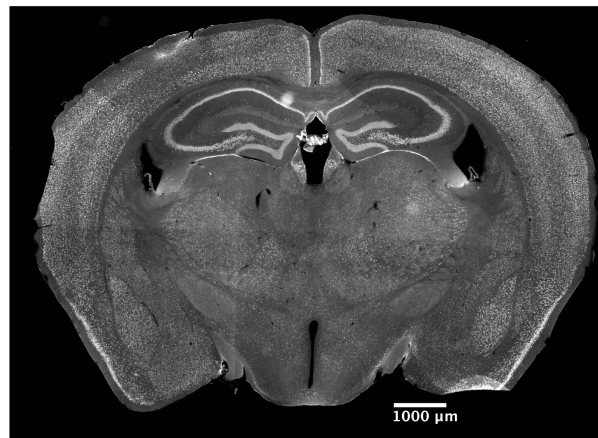

p-S6  
(240/244)

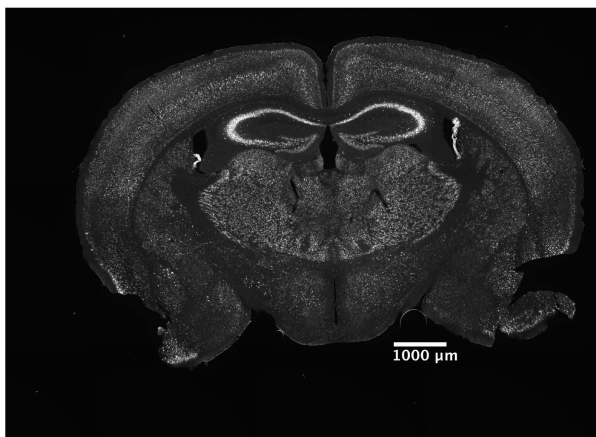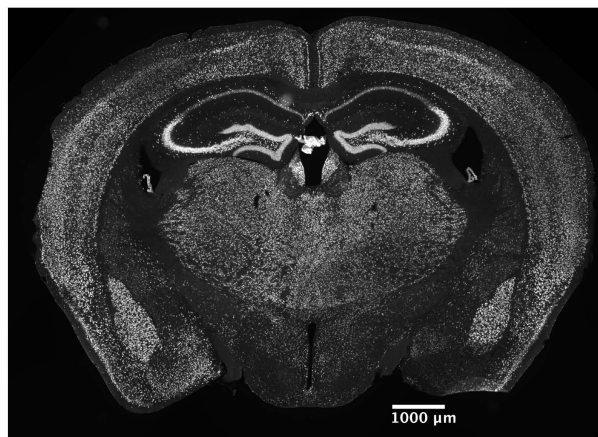

Merge  
(NeuN - green)  
(p-S6 - red)  
(DAPI - blue)

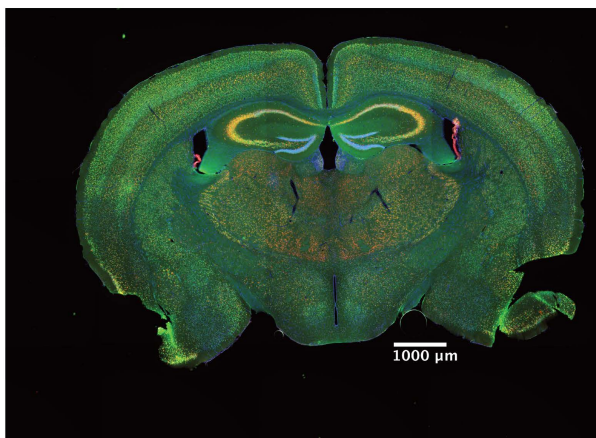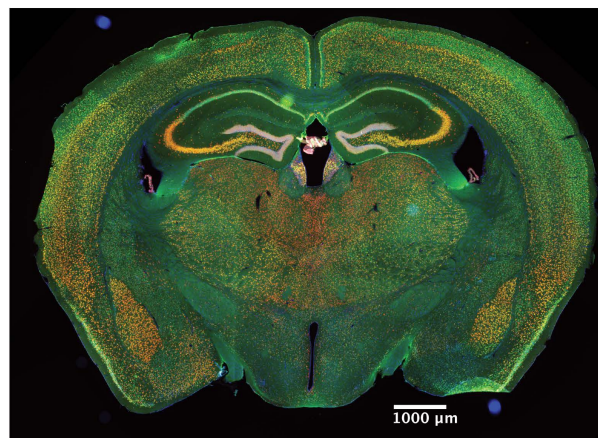



A.

Olig2

p-S6

Merge with DAPI

*Depdc5* cc+

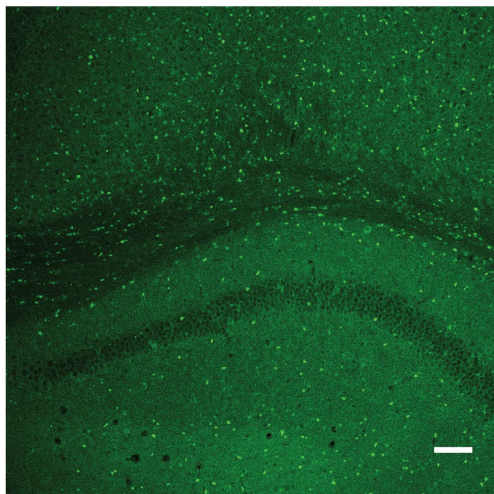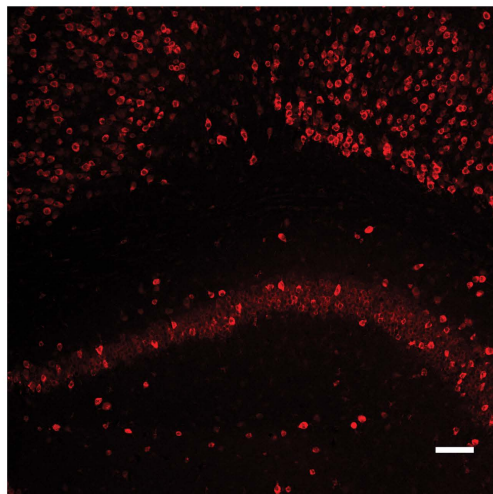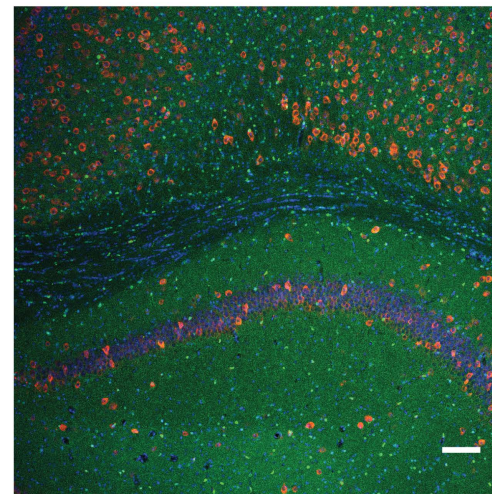

B.

Olig2

p-S6

Merge with DAPI

*Depdc5* cc+

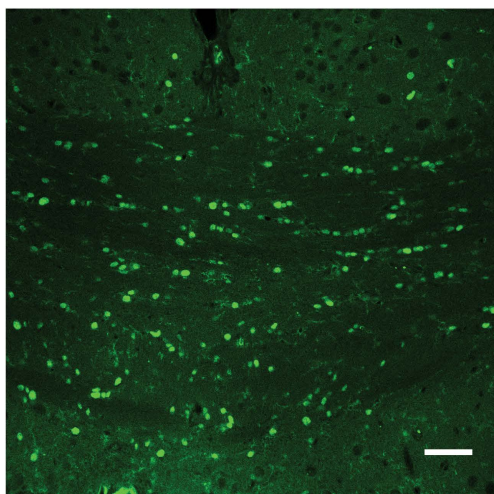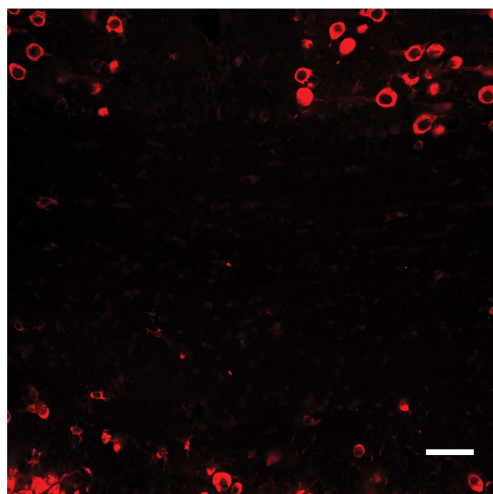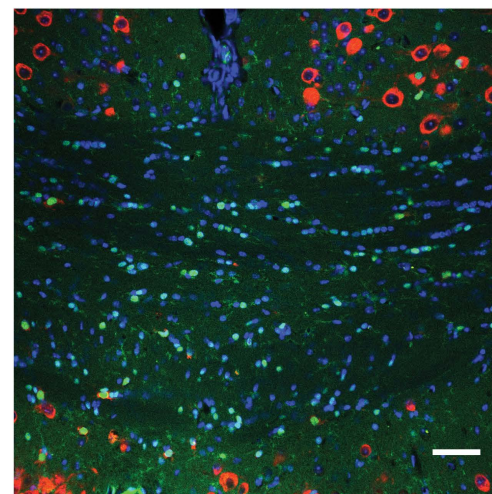

Supplement: NIHMS931040-supplement.pdf [file NIHMS931040-supplement.pdf]
